# Supplementary material for: Mapping of Mycobacterium tuberculosis Complex Genetic Diversity Profiles in Tanzania and Other African Countries
Source: PubMed Central journal article supplement (PMC4858144; doi:10.1371/journal.pone.0154571), 2016-05-05

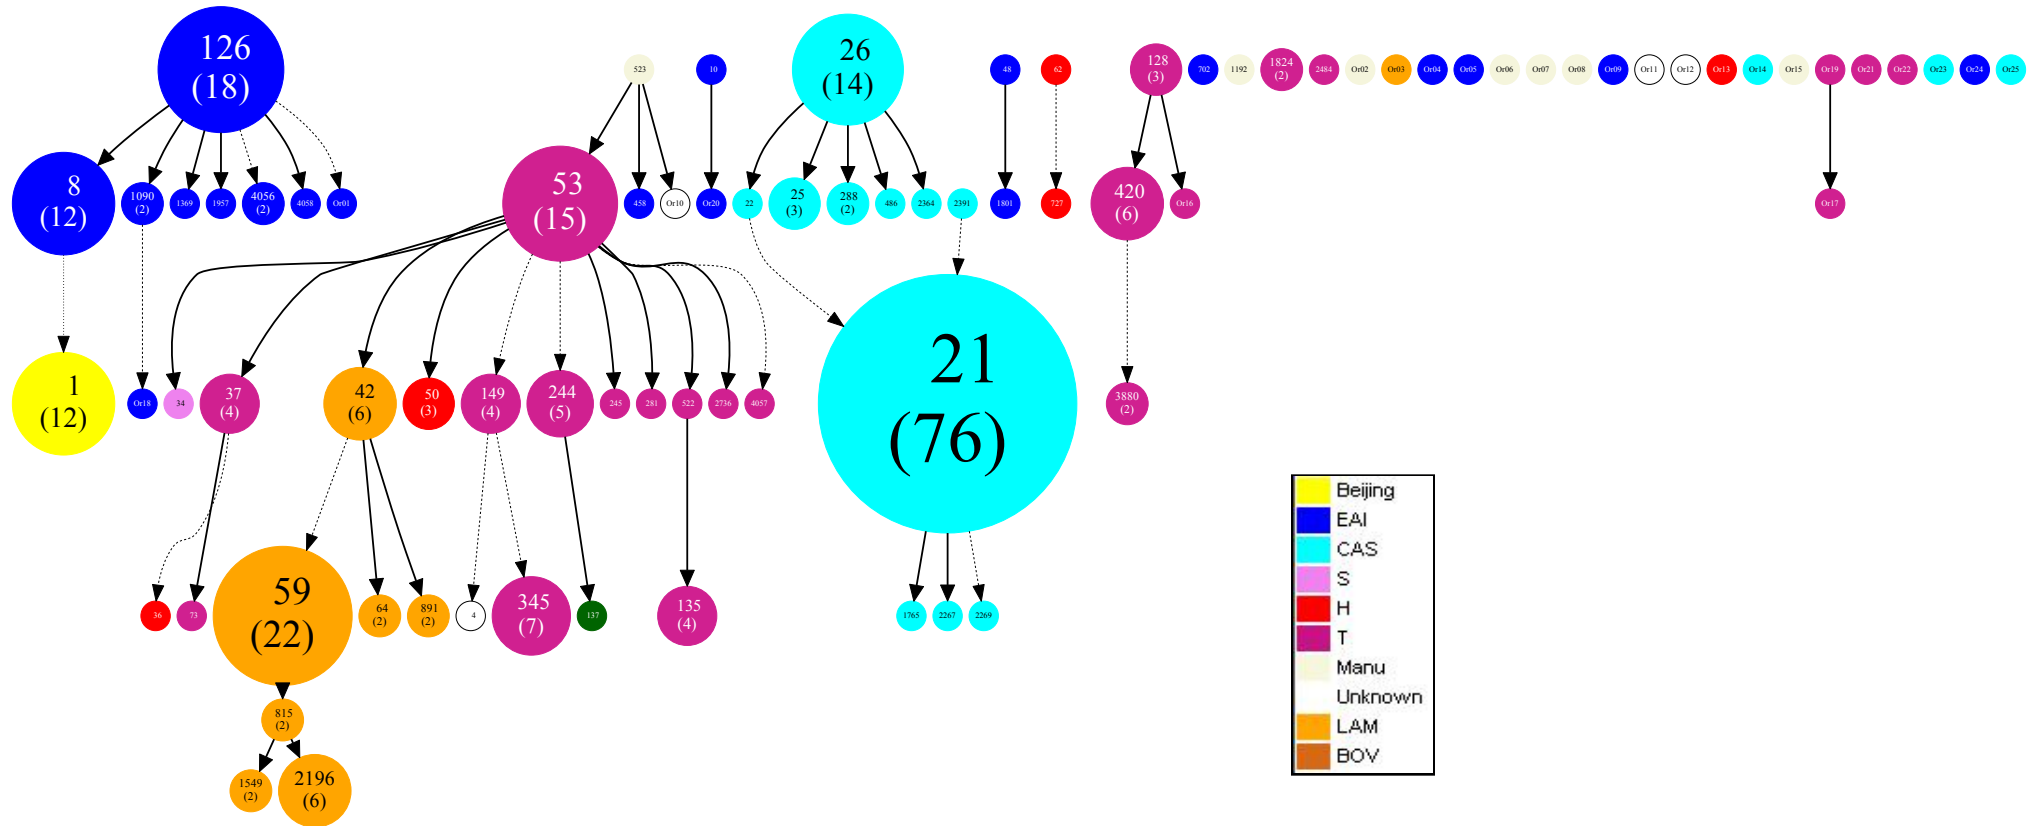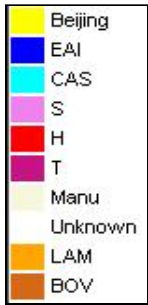

Supplement: pone.0154571.s001.pdf [file pone.0154571.s001.pdf]
