# Supplementary material for: Mapping of Mycobacterium tuberculosis Complex Genetic Diversity Profiles in Tanzania and Other African Countries
Source: PLoS One. 2016 May 5;11(5):e0154571. doi: 10.1371/journal.pone.0154571 (PMC4858144; doi:10.1371/journal.pone.0154571)
Supplement: S1 Table — Note that all strains were pansusceptible, and were isolated from newly diagnosed, sputum smear/culture positive pulmonary TB patients. NEW SITs are followed by an asterisk (*) and highlighted in yellow. Orphan spoligotypes are highlighted in blue. (PDF) [file pone.0154571.s002.pdf]

| IsoNumber       | Year | Strain | Spoligotype Description        | Octal code      | SIT | Lineage   | Isolation city | Sex/Age | HIV Status   |
|-----------------|------|--------|--------------------------------|-----------------|-----|-----------|----------------|---------|--------------|
| TZA0220121B0725 | 2012 | B0725  | □□□□□□□□□□□□□□□□□□□□■□□□□□□□   | 000000000003771 | 1   | Beijing   | Bunda          | F/41    | positive     |
| TZA0220101B0656 | 2010 | B0656  | □□□□□□□□□□□□□□□□□□□□■□□□□□□□   | 000000000003771 | 1   | Beijing   | Bunda          | M/31    | negative     |
| TZA0220111S0697 | 2011 | S0697  | □□□□□□□□□□□□□□□□□□□□■□□□□□□□   | 000000000003771 | 1   | Beijing   | Serengeti      | M/33    | negative     |
| TZA0220111S0705 | 2011 | S0705  | □□□□□□□□□□□□□□□□□□□□■□□□□□□□   | 000000000003771 | 1   | Beijing   | Serengeti      | M/22    | negative     |
| TZA0220111S0710 | 2011 | S0710  | □□□□□□□□□□□□□□□□□□□□■□□□□□□□   | 000000000003771 | 1   | Beijing   | Serengeti      | M/46    | negative     |
| TZA0220121S0700 | 2012 | S0700  | □□□□□□□□□□□□□□□□□□□□■□□□□□□□   | 000000000003771 | 1   | Beijing   | Serengeti      | M/51    | negative     |
| TZA0220121B0724 | 2012 | B0724  | □□□□□□□□□□□□□□□□□□□□■□□□□□□□   | 000000000003771 | 1   | Beijing   | Bunda          | M/37    | negative     |
| TZA0220121N1254 | 2012 | N1254  | □□□□□□□□□□□□□□□□□□□□■□□□□□□□   | 000000000003771 | 1   | Beijing   | Ngorongoro     | F/29    | negative     |
| TZA0220121D0167 | 2012 | D0167  | □□□□□□□□□□□□□□□□□□□□■□□□□□□□   | 000000000003771 | 1   | Beijing   | Dar es Salaam  | M/19    | Not recorded |
| TZA0220111D0122 | 2011 | D0122  | □□□□□□□□□□□□□□□□□□□□■□□□□□□□   | 000000000003771 | 1   | Beijing   | Dar es Salaam  | M/27    | Not recorded |
| TZA0220121D0150 | 2012 | D0150  | □□□□□□□□□□□□□□□□□□□□■□□□□□□□   | 000000000003771 | 1   | Beijing   | Dar es Salaam  | M/34    | Not recorded |
| TZA0220111D0106 | 2011 | D0106  | □□□□□□□□□□□□□□□□□□□□■□□□□□□□   | 000000000003771 | 1   | Beijing   | Dar es Salaam  | F/43    | Not recorded |
| TZA0220121N1012 | 2012 | N1012  | □□□□□□□□□□□□□□□□■□□□□□□□□□□□□□ | 000000007760771 | 4   | Unknown   | Ngorongoro     | F/25    | negative     |
| TZA0220111B0721 | 2011 | B0721  | ■□□□□□□□□□□□□□□□□□□□■□□□□□□□   | 400037777413771 | 8   | EAI5      | Bunda          | M/36    | negative     |
| TZA0220111N1273 | 2011 | N1273  | ■□□□□□□□□□□□□□□□□□□□■□□□□□□□   | 400037777413771 | 8   | EAI5      | Ngorongoro     | F/45    | negative     |
| TZA0220101B0587 | 2010 | B0587  | ■□□□□□□□□□□□□□□□□□□□■□□□□□□□   | 400037777413771 | 8   | EAI5      | Bunda          | F/28    | positive     |
| TZA0220101S0012 | 2010 | S0012  | ■□□□□□□□□□□□□□□□□□□□■□□□□□□□   | 400037777413771 | 8   | EAI5      | Serengeti      | F/25    | negative     |
| TZA0220121D0155 | 2012 | D0155  | ■□□□□□□□□□□□□□□□□□□□■□□□□□□□   | 400037777413771 | 8   | EAI5      | Dar es Salaam  | F/41    | Not recorded |
| TZA0220121D0173 | 2012 | D0173  | ■□□□□□□□□□□□□□□□□□□□■□□□□□□□   | 400037777413771 | 8   | EAI5      | Dar es Salaam  | M/33    | Not recorded |
| TZA0220121D0179 | 2012 | D0179  | ■□□□□□□□□□□□□□□□□□□□■□□□□□□□   | 400037777413771 | 8   | EAI5      | Dar es Salaam  | F/39    | Not recorded |
| TZA0220121D0181 | 2012 | D0181  | ■□□□□□□□□□□□□□□□□□□□■□□□□□□□   | 400037777413771 | 8   | EAI5      | Dar es Salaam  | F/20    | Not recorded |
| TZA0220121D0142 | 2012 | D0142  | ■□□□□□□□□□□□□□□□□□□□■□□□□□□□   | 400037777413771 | 8   | EAI5      | Dar es Salaam  | M/35    | Not recorded |
| TZA0220121D0168 | 2012 | D0168  | ■□□□□□□□□□□□□□□□□□□□■□□□□□□□   | 400037777413771 | 8   | EAI5      | Dar es Salaam  | M/32    | Not recorded |
| TZA0220111D0127 | 2011 | D0127  | ■□□□□□□□□□□□□□□□□□□□■□□□□□□□   | 400037777413771 | 8   | EAI5      | Dar es Salaam  | F/39    | Not recorded |
| TZA0220111D0116 | 2011 | D0116  | ■□□□□□□□□□□□□□□□□□□□■□□□□□□□   | 400037777413771 | 8   | EAI5      | Dar es Salaam  | M/27    | Not recorded |
| TZA0220111D0115 | 2011 | D0115  | ■□□□□□□□□□□□□□□□□□□□■□□□□□□□   | 477777277413771 | 10  | EAI8-MDG  | Dar es Salaam  | M/26    | Not recorded |
| TZA0220111N1172 | 2011 | N1172  | ■■□□□□■□□□□□□□□□□□□□□□□■□□□□□□ | 703377400001771 | 21  | CAS1-Kili | Ngorongoro     | M/42    | negative     |
| TZA0220101B0586 | 2010 | B0586  | ■■□□□□■□□□□□□□□□□□□□□□□■□□□□□□ | 703377400001771 | 21  | CAS1-Kili | Bunda          | F/38    | negative     |
| TZA0220101N0481 | 2010 | N0481  | ■■□□□□■□□□□□□□□□□□□□□□□■□□□□□□ | 703377400001771 | 21  | CAS1-Kili | Ngorongoro     | M/39    | negative     |
| TZA0220101N1265 | 2010 | N1265  | ■■□□□□■□□□□□□□□□□□□□□□□■□□□□□□ | 703377400001771 | 21  | CAS1-Kili | Ngorongoro     | M/32    | negative     |
| TZA0220101N1161 | 2010 | N1161  | ■■□□□□■□□□□□□□□□□□□□□□□■□□□□□□ | 703377400001771 | 21  | CAS1-Kili | Ngorongoro     | F/35    | negative     |
| TZA022011       |      |        |                                |                 |     |           |                |         |              |

[illegible]

[illegible]

[illegible]

[illegible]
